# Supplementary material for: Single-Cell Transcriptional Profile Construction of Rat Pituitary Glands before and after Sexual Maturation and Identification of Novel Marker Spp1 in Gonadotropes
Source: MDPI journal article supplement (doi:10.3390/ijms25094694), 2024-04-25
Supplement: s1 [file s1]

# Single-cell transcriptional profile construction of rat pituitary glands before and after sexual maturation and identification of novel marker *Spp1* in gonadotropes

Qing-Hua Huang, Guo-Kun Zhao, Hao-Qi Wang, Fan-Hao Wei, Jin-Yu Zhang,  
Jia-Bao Zhang, Fei Gao, Bao Yuan

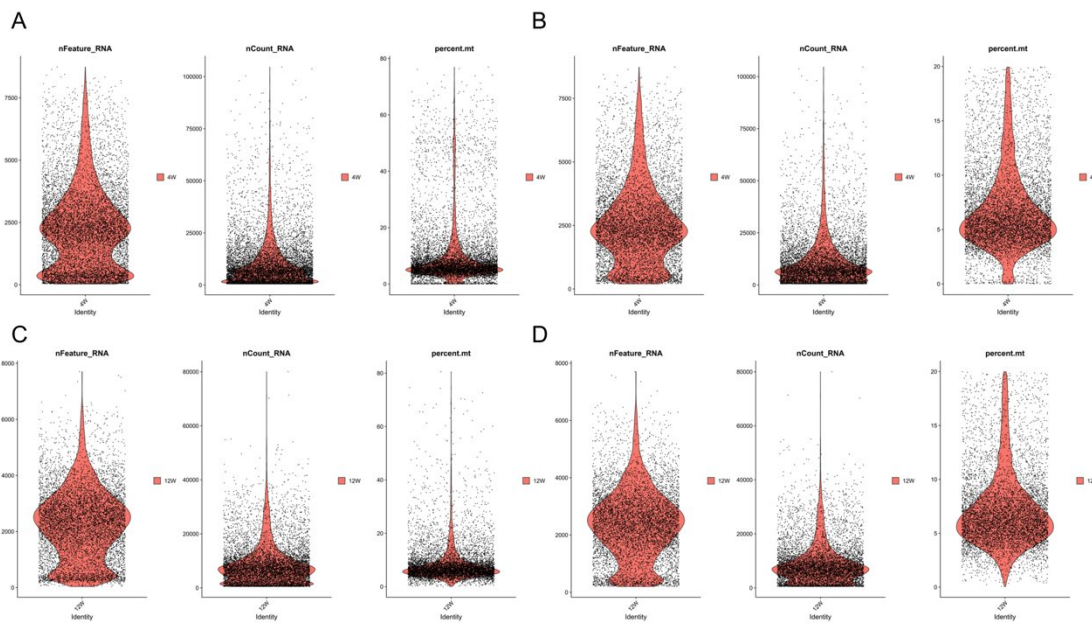

**Figure S1. Violin plots of nFeature RNA, nCount RNA and mitochondria percent.** (A, C) Violin plots of raw gene UMI mito percent. (B, D) Violin plots of filter gene UMI mito percent.

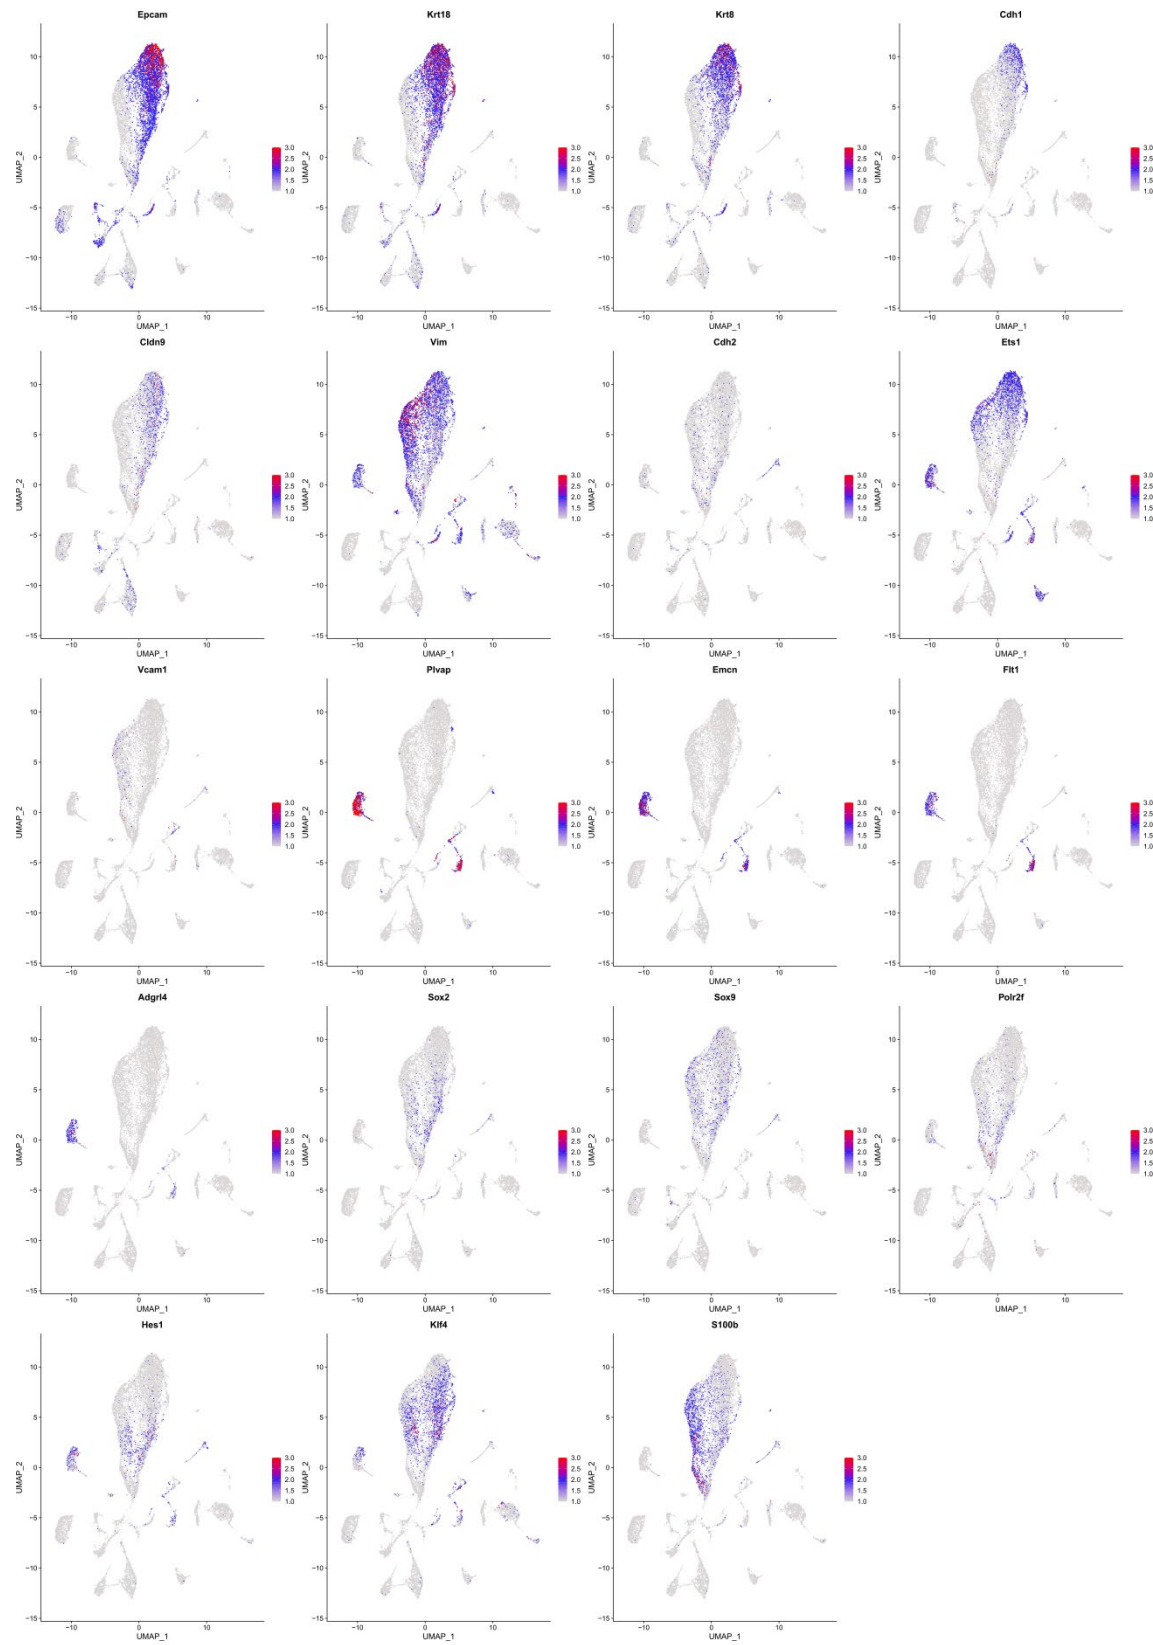

**Figure S2.** UMAP maps of marker genes in distinct pituitary non-hormone cell clusters.
